# Supplementary material
Source: PubMed Central journal article supplement (PMC1855395)

**miR-150**

**miR-195**

MDH

miR-150-90nt

miR-150-130nt

MDH

miR-195-90nt

miR-195-140nt

60nt -

50nt -

40nt -

30nt -

20nt -

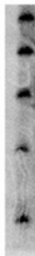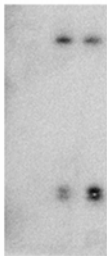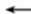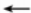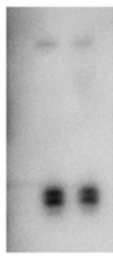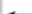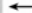

← pre-miRNA

← mature miRNA

Supplement: pnas_0702409104_2.pdf [file pnas_0702409104_2.pdf]

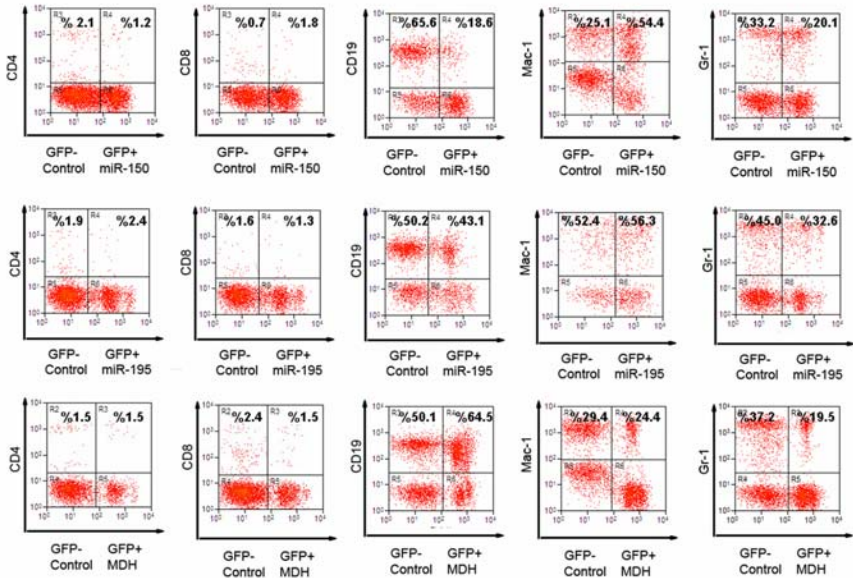

Supplement: pnas_0702409104_3.pdf [file pnas_0702409104_3.pdf]
